# Supplementary material for: Differential mitochondrial protein interaction profile between human translocator protein and its A147T polymorphism variant
Source: PubMed Central journal article supplement (PMC9075623; doi:10.1371/journal.pone.0254296), 2022-05-06
Supplement: pone.0254296.s001.pdf [file pone.0254296.s001.pdf]

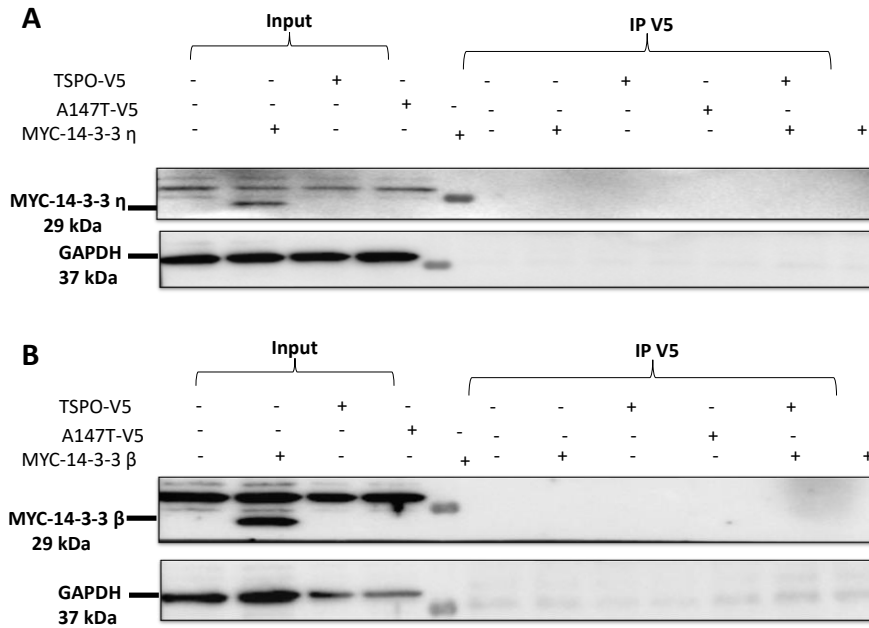

**Fig S1. Validated non-interactors of hTSPO<sup>WT</sup> and hTSPO<sup>A147T</sup>.** A-B) 14-3-3  $\eta$  protein (YWHAH) and 14-3-3  $\beta$  (YWHAB) were expressed in U87MG cells together with V5-tagged human TSPO<sup>WT</sup> or TSPO<sup>A147T</sup>. A) Co-IP of YWHAH and hTSPO<sup>WT</sup> or hTSPO<sup>A147T</sup> with V5 antibody and detected by immunoblotting for myc. YWHAH was not co-purified with V5. B) Co-IP of YWHAB and hTSPO<sup>WT</sup> or hTSPO<sup>A147T</sup> with V5 antibody and detected by immunoblotting for myc. YWHAB was not co-purified with V5.
